# Supplementary material
Source: HighWire-hosted journal article supplement (https://www.annfammed.org/highwire/filestream/7823/field_highwire_adjunct_files/1/TMEDNuttingJourneySupp_Fig.pdf)
Supplement: TMEDNuttingJourneySupp_Fig.pdf [file TMEDNuttingJourneySupp_Fig.pdf]

# ANNALS OF FAMILY MEDICINE

## Online Supplementary Material

Nutting PA, Crabtree BF, Miller WL, et al. Journey to the patient-centered medical home: a qualitative analysis of the experiences of practices in the National Demonstration Project. *Ann Fam Med*. 2010;8(Suppl 1)s45-s56.

[http://www.annfammed.org/cgi/content/full/8/Suppl\\_1/s45/DC1](http://www.annfammed.org/cgi/content/full/8/Suppl_1/s45/DC1)

### Supplemental Figure. The original "New Model" of practice as conceptualized by TransforMED.

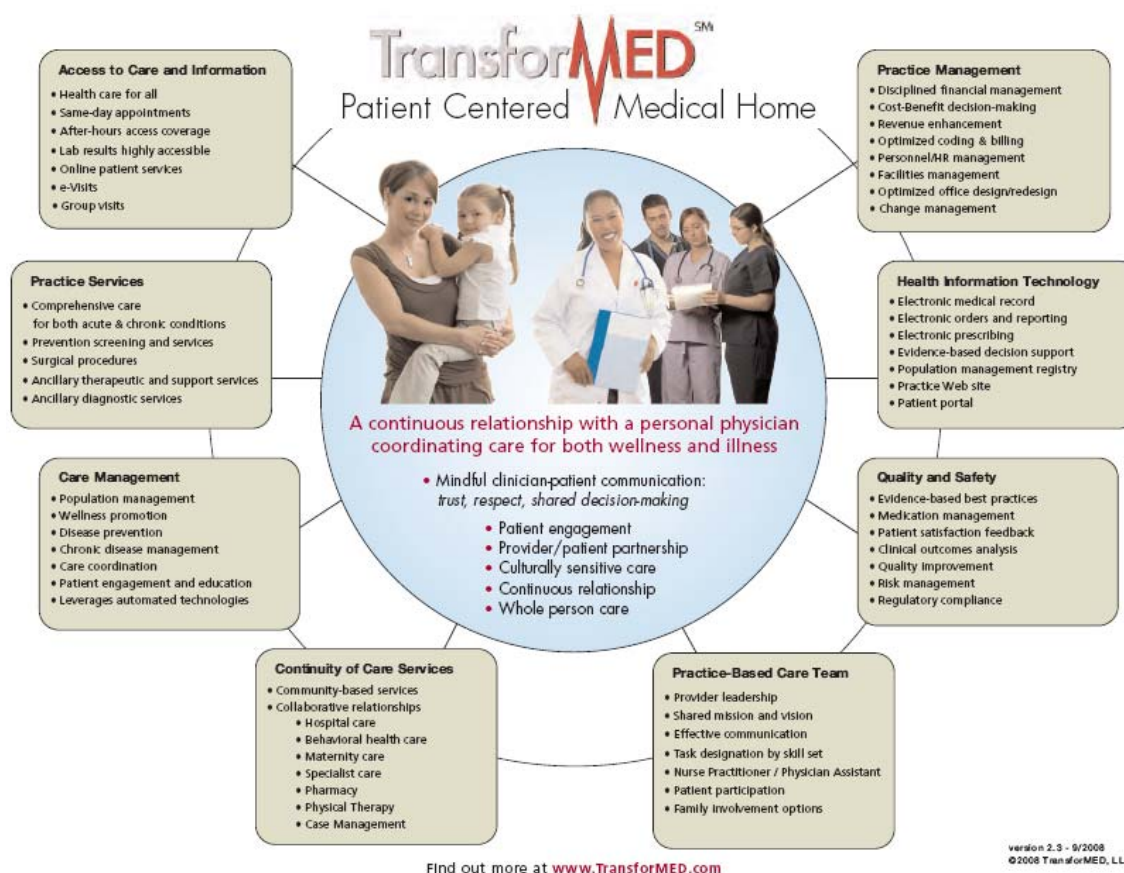

Reprinted with permission from TransforMED, Leawood, Kansas.
